# Supplementary material for: Iron stress affects the survival of Toxoplasma gondii
Source: Research Square preprint supplement (doi:10.21203/rs.3.rs-3240882/v1), 2023-08-11
Supplement: Supplementary file 1 [file cdd23efd38ed36f9e6114fd1.xlsx]

## Sheet: 50μM DFO vs N
gene_id	50μM DFO	N	log2FoldChange	pvalue	padj
TGGT1_294585	15.18	0	6.1651	0.00027883	0.0019763
TGGT1_255480	11.9	0	5.8146	0.00090865	0.0052686
TGGT1_219828	186.04	3.45	5.7571	1.65e-12	8.53e-11
TGGT1_212030	9.25	0	5.4495	0.0025781	0.012389
TGGT1_278340	8.58	0	5.3407	0.0021968	0.011006
TGGT1_253330	808.35	21.14	5.261	3.13e-10	1.02e-08
TGGT1_207160	60	1.75	5.2134	2.12e-06	2.84e-05
TGGT1_282030	39.71	1.07	5.1376	2.24e-06	3e-05
TGGT1_207150	48.13	1.51	4.9837	4.47e-07	7.18e-06
TGGT1_237070	97.46	3.35	4.9356	3.15e-09	8.78e-08
TGGT1_207210	23.37	0.8	4.9216	0.00012109	0.00098799
TGGT1_276820	11.29	0.35	4.781	0.0010373	0.0059016
TGGT1_235580	11.1	0.44	4.7507	0.001535	0.0082094
TGGT1_301150	114.63	4.53	4.6538	3.62e-10	1.17e-08
TGGT1_211910	4.27	0	4.333	0.030247	0.086156
TGGT1_209755B	91.14	4.54	4.3216	1.25e-08	3.02e-07
TGGT1_319890	109.38	5.75	4.2535	3.04e-11	1.2e-09
TGGT1_367060	7.42	0.35	4.179	0.0099983	0.036754
TGGT1_409220	3.82	0	4.1763	0.030626	0.086973
TGGT1_276850	7.38	0.36	4.1656	0.012485	0.043233
TGGT1_301170	158.56	8.97	4.1307	5.25e-13	2.87e-11
TGGT1_235315	25.73	1.51	4.0781	0.00053837	0.0034211
TGGT1_209755A	63.27	3.82	4.0507	8.37e-07	1.27e-05
TGGT1_240290	37.52	2.22	4.0459	7.65e-07	1.17e-05
TGGT1_314250	1215.13	76.34	3.9956	9.56e-57	1.35e-53
TGGT1_207140	219.96	13.87	3.9802	2.34e-10	7.84e-09
TGGT1_225413	6.29	0.36	3.9317	0.016022	0.052561
TGGT1_410590	49.36	3.38	3.8527	2.2e-08	4.82e-07
TGGT1_306455	488.83	34.5	3.8278	3.81e-33	1.4e-30
TGGT1_411350	202.24	14.3	3.8148	2.25e-13	1.32e-11
TGGT1_239570	5.64	0.35	3.7751	0.024161	0.072424
TGGT1_249660	265.91	21.04	3.6523	3.59e-16	3.24e-14
TGGT1_283698	19.72	1.67	3.6356	0.0010265	0.0058441
TGGT1_306450	2450.82	202.9	3.5965	2.79e-50	2.63e-47
TGGT1_233040	84.36	7.12	3.5525	4.72e-10	1.49e-08
TGGT1_202260	4.81	0.35	3.5437	0.039501	0.10654
TGGT1_292260	57.07	4.89	3.5361	4.1e-05	0.00039247
TGGT1_295750	4.63	0.36	3.4966	0.040949	0.10971
TGGT1_231780	40.37	3.73	3.4145	4.64e-07	7.38e-06
TGGT1_311370	22.86	2.14	3.3553	0.00027274	0.0019445
TGGT1_202025	73.17	7.18	3.3413	2e-07	3.54e-06
TGGT1_257130	66.64	6.73	3.333	1.33e-07	2.48e-06
TGGT1_252640	132.82	13.3	3.3172	5.93e-21	9.67e-19
TGGT1_219348	60.76	6.13	3.3113	1.44e-07	2.67e-06
TGGT1_221830	59.05	6.1	3.273	1.23e-05	0.00013556
TGGT1_246763	7.11	0.71	3.2429	0.019767	0.061722
TGGT1_229330	107.22	11.59	3.2374	1.37e-09	4.04e-08
TGGT1_319988	11.03	1.24	3.2302	0.0066841	0.026734
TGGT1_248820	75.9	8.23	3.2203	2.79e-07	4.75e-06
TGGT1_315560	64.45	6.92	3.201	0.00032209	0.0022252
TGGT1_292270	19.61	2.23	3.1197	0.021056	0.06474
TGGT1_290970	899.98	104.69	3.1063	4.34e-14	2.88e-12
TGGT1_251940	6.6	0.8	3.101	0.026833	0.078572
TGGT1_301160	461.58	54.04	3.0974	7.55e-10	2.31e-08
TGGT1_278380	12.84	1.59	3.0423	0.0089802	0.033879
TGGT1_254360	14.56	1.87	2.9429	0.024003	0.072103
TGGT1_295740	62.49	8.48	2.9097	1.81e-05	0.00018929
TGGT1_309330	46.38	6.22	2.8652	4.64e-06	5.7e-05
TGGT1_312440	11.35	1.59	2.8623	0.016554	0.053924
TGGT1_309352	58.28	8.28	2.8534	8.1e-05	0.00069643
TGGT1_308093	79.43	10.93	2.853	6.04e-07	9.39e-06
TGGT1_411360	32.82	4.61	2.8354	6.82e-05	0.00060074
TGGT1_285860	163.78	23.53	2.8064	6.59e-07	1.02e-05
TGGT1_207350	25.58	3.64	2.7819	0.0044725	0.019334
TGGT1_358510	16.13	2.47	2.7621	0.0059097	0.02412
TGGT1_272440	218.21	32.63	2.7425	1.23e-08	3e-07
TGGT1_269315	57.56	8.82	2.7269	0.00020786	0.0015451
TGGT1_260190	3363.98	511.89	2.7164	9.15e-47	6.46e-44
TGGT1_358840	14.59	2.14	2.7144	0.01088	0.039093
TGGT1_245670	276.42	44.12	2.6478	8.03e-07	1.23e-05
TGGT1_293420	72.9	11.77	2.6464	5.53e-07	8.62e-06
TGGT1_409240	11.47	1.78	2.6291	0.012744	0.043739
TGGT1_285410	51.81	8.34	2.629	5.45e-05	0.00049426
TGGT1_254330	137.55	23.15	2.5668	6.85e-15	5.14e-13
TGGT1_242100	70.95	11.92	2.5547	1.09e-08	2.72e-07
TGGT1_255620	73.56	12.84	2.5266	6.88e-06	8.06e-05
TGGT1_230480	1239.24	218.59	2.5037	9.86e-06	0.00011066
TGGT1_212970	411.8	72.62	2.5014	7.13e-10	2.21e-08
TGGT1_204460	32.32	5.75	2.495	8.9e-05	0.00075864
TGGT1_224170	80.29	14.33	2.4928	9.66e-07	1.43e-05
TGGT1_202140	36.06	6.72	2.4578	7.63e-06	8.81e-05
TGGT1_209985	1184.95	219	2.4384	6.24e-26	1.43e-23
TGGT1_278365	239.67	44.23	2.4372	5.71e-06	6.86e-05
TGGT1_356400	1774.07	329.57	2.4296	2.71e-31	8.82e-29
TGGT1_304920	18.39	3.46	2.4116	0.0036798	0.016444
TGGT1_208850	552.82	106.11	2.381	4.06e-14	2.71e-12
TGGT1_293780	3312.35	642.94	2.3653	1.31e-21	2.22e-19
TGGT1_278840	63.18	12.27	2.3507	0.00017169	0.0013243
TGGT1_411100	29.22	5.76	2.3453	0.000557	0.0035236
TGGT1_278080	33.8	6.81	2.334	0.0026826	0.01279
TGGT1_409850	103.63	20.66	2.3263	2.84e-07	4.83e-06
TGGT1_211050	33.53	6.89	2.319	0.00073179	0.0044058
TGGT1_217400	1155.77	233.07	2.3106	3.67e-12	1.75e-10
TGGT1_309300	78.33	15.94	2.3009	0.00071122	0.0043126
TGGT1_254060	25	5.22	2.28	0.014826	0.049364
TGGT1_214545	13.43	2.91	2.2742	0.014008	0.047138
TGGT1_294570	14.64	3.02	2.265	0.018448	0.058611
TGGT1_202430	401.13	85.11	2.2405	2.53e-14	1.76e-12
TGGT1_294600	21.43	4.68	2.2082	0.0025495	0.0123
TGGT1_292275	37.44	8.16	2.2026	0.0053462	0.022325
TGGT1_320170	86.39	18.95	2.1932	9.12e-06	0.00010337
TGGT1_261250	174.78	38.67	2.1875	3.61e-11	1.4e-09
TGGT1_213700	131.42	29.09	2.1782	2.84e-12	1.4e-10
TGGT1_224180	96.69	21.63	2.1653	5.49e-07	8.59e-06
TGGT1_223900	30.14	6.75	2.144	0.0014157	0.0076731
TGGT1_243900	17	3.9	2.1381	0.0059566	0.024264
TGGT1_271320	645.81	146.84	2.1353	7.94e-16	6.8e-14
TGGT1_294320	42.24	9.67	2.1321	0.00077044	0.0045864
TGGT1_220330	248.15	57.85	2.1111	4.27e-17	4.26e-15
TGGT1_291040	34.47	8.23	2.0831	0.00038229	0.002574
TGGT1_295015	67.16	15.73	2.0825	2.61e-05	0.00026193
TGGT1_367020	35.79	8.29	2.079	0.0028278	0.013303
TGGT1_243190	21.05	4.97	2.0789	0.012288	0.04271
TGGT1_254350	32.24	7.63	2.0751	0.0017203	0.0090243
TGGT1_205420	17.64	4.18	2.0702	0.018459	0.058611
TGGT1_222020	477.53	113.89	2.0655	1.45e-06	2.04e-05
TGGT1_237860	409.01	99.16	2.0452	4.61e-09	1.23e-07
TGGT1_237170	740.76	184.94	2.003	4.13e-09	1.12e-07
TGGT1_252300	0.52	16.24	-4.8336	0.00012107	0.00098799
TGGT1_231055	0.52	11.85	-4.382	0.001587	0.0084189
TGGT1_408240	0.26	5.65	-4.1558	0.016672	0.054212
TGGT1_230135	0.26	5.12	-4.0196	0.021295	0.065264
TGGT1_297310	2.24	30.74	-3.7459	3.88e-07	6.37e-06
TGGT1_259180	0.32	4.09	-3.7097	0.036685	0.10037
TGGT1_290923	0.58	7.09	-3.5995	0.013589	0.045985
TGGT1_314482	1.2	12.43	-3.4076	0.00077364	0.0046022
TGGT1_239670	1.9	19.77	-3.3183	0.0002809	0.0019876
TGGT1_289020	1.7	16.87	-3.2899	0.00013784	0.0011107
TGGT1_410490	1.24	11.41	-3.2475	0.0036934	0.016478
TGGT1_222980	1.2	10.37	-3.1383	0.0027409	0.012987
TGGT1_216053	1.46	12.25	-3.0814	0.0017335	0.0090801
TGGT1_242740	6.96	56.93	-3.0245	2.72e-10	8.98e-09
TGGT1_239430	13.07	97.76	-2.9027	3.55e-18	4.23e-16
TGGT1_252080	4.81	35.12	-2.8937	4.99e-07	7.86e-06
TGGT1_275590	6.12	46.07	-2.8856	1.03e-06	1.51e-05
TGGT1_322130	1.18	8.44	-2.8467	0.012848	0.044022
TGGT1_289023	7.21	52.04	-2.842	4.31e-10	1.37e-08
TGGT1_254190	1.42	10.16	-2.8184	0.018254	0.058128
TGGT1_410460	4.56	32.28	-2.8144	1.87e-05	0.00019423
TGGT1_256788	1.82	12.33	-2.7914	0.0034416	0.015601
TGGT1_281555	4.32	29.46	-2.7642	3.66e-06	4.63e-05
TGGT1_273468	4.8	33.16	-2.7612	3.99e-06	5e-05
TGGT1_279000	1.16	7.81	-2.7535	0.025259	0.074972
TGGT1_409410	1.4	9.42	-2.7214	0.0091487	0.034346
TGGT1_314670	35.3	232.52	-2.7114	8.14e-28	2.09e-25
TGGT1_259270	19.8	129.25	-2.7066	9.84e-21	1.52e-18
TGGT1_205662	4.92	31.5	-2.6753	1.26e-06	1.81e-05
TGGT1_268220	9.47	60.77	-2.6708	5.77e-11	2.2e-09
TGGT1_295640	4.62	29.16	-2.6582	1.46e-05	0.00015615
TGGT1_316560	26.6	165.47	-2.6239	6.16e-16	5.5e-14
TGGT1_273940	3.49	21.54	-2.6211	0.00013159	0.0010664
TGGT1_220025	64.03	391.13	-2.6038	6.98e-41	4.23e-38
TGGT1_202735	1.98	11.99	-2.5815	0.0043987	0.019083
TGGT1_235950	8.89	53.3	-2.5759	9.63e-08	1.85e-06
TGGT1_233405	21.08	121.16	-2.5085	2.22e-14	1.55e-12
TGGT1_228175	27.32	154.66	-2.4884	4.21e-09	1.13e-07
TGGT1_313000	30.38	170.29	-2.4755	1.51e-10	5.28e-09
TGGT1_253550	2.8	15.78	-2.4713	0.0030744	0.014234
TGGT1_267410	6.14	32.92	-2.4272	1.65e-05	0.00017389
TGGT1_289027	5.66	30.72	-2.4249	3.99e-05	0.00038345
TGGT1_409770	1.38	7.62	-2.4239	0.035366	0.097683
TGGT1_408430	1.14	6.2	-2.4182	0.039977	0.10765
TGGT1_268270	3.84	20.16	-2.4118	0.0003866	0.002601
TGGT1_239660	1.44	7.72	-2.4087	0.026205	0.077123
TGGT1_409890	1.66	8.93	-2.3875	0.032284	0.090799
TGGT1_410030	1.78	9.23	-2.3837	0.024411	0.072971
TGGT1_260000	12.17	63.27	-2.3743	3.58e-09	9.81e-08
TGGT1_310480	41.63	215.48	-2.3684	1.14e-22	2.15e-20
TGGT1_281360	3.05	15.08	-2.3364	0.0090934	0.034214
TGGT1_410820	2.04	10.29	-2.3347	0.012946	0.044216
TGGT1_213340	74.87	374.95	-2.3223	8.92e-33	3.15e-30
TGGT1_204290	13.26	66.05	-2.3123	6.26e-09	1.64e-07
TGGT1_320240	3.18	15.61	-2.2913	0.0019771	0.010127
TGGT1_209510	6.12	29.92	-2.2637	0.00037423	0.0025318
TGGT1_278522	11.85	55.84	-2.2293	1.51e-08	3.55e-07
TGGT1_209470	4.32	20.07	-2.2107	0.00075776	0.0045268
TGGT1_209620	2.9	13.16	-2.193	0.011722	0.04121
TGGT1_210990	14.14	64.63	-2.1767	4.72e-07	7.5e-06
TGGT1_203070	30.64	139.64	-2.1765	8.41e-14	5.28e-12
TGGT1_240230	3.56	15.81	-2.1698	0.0029173	0.013663
TGGT1_224080	11.53	51.18	-2.1617	4.5e-07	7.2e-06
TGGT1_205140	14.2	63.18	-2.1526	1.4e-08	3.3e-07
TGGT1_239650	3.78	16.75	-2.1514	0.012798	0.043869
TGGT1_272620	11.06	49.56	-2.1453	4.31e-06	5.35e-05
TGGT1_203900	11.03	48.76	-2.1443	9.02e-07	1.35e-05
TGGT1_262575	3.62	16.21	-2.1284	0.0052666	0.022069
TGGT1_321490	38.7	168.21	-2.1124	4.37e-15	3.37e-13
TGGT1_253480	18.63	81.4	-2.1099	4.36e-08	9.08e-07
TGGT1_252090	7.21	31.43	-2.1089	0.0059929	0.024401
TGGT1_242300	2.34	10.1	-2.1072	0.019402	0.060893
TGGT1_268190	24.81	104.88	-2.0853	1.4e-11	5.98e-10
TGGT1_312980	14.68	62.42	-2.0785	3.84e-08	8.16e-07
TGGT1_293890	18.22	77.6	-2.0767	4.17e-08	8.77e-07
TGGT1_410960	4.88	20.49	-2.0617	0.00089437	0.0052143
TGGT1_214430	410.48	1706.33	-2.0541	4.07e-69	8.62e-66
TGGT1_246110	4.9	20.34	-2.0503	0.0010183	0.0058052
TGGT1_257970	2.3	9.49	-2.0386	0.025892	0.076476
TGGT1_231998	14.28	58.92	-2.033	2.74e-07	4.69e-06
TGGT1_221415	4.34	17.9	-2.0325	0.0031962	0.014701
TGGT1_297920	16.63	68.1	-2.032	4.2e-08	8.82e-07
TGGT1_289040	32.2	132.23	-2.0308	1.77e-12	9.02e-11
TGGT1_239640	3.46	13.97	-2.0106	0.017782	0.056991
TGGT1_227630	1253.26	5051.76	-2.0105	2.37e-51	2.51e-48
TGGT1_236900	21.89	87.57	-2.0026	2.15e-09	6.13e-08

## Sheet: 200μM Fe vs N
gene_id	200μM Fe	N	log2FoldChange	pvalue	padj
TGGT1_367060	5.59	0.31	3.9522	0.0082917	0.015782
TGGT1_224790	4.56	0.39	3.6618	0.018311	0.032651
TGGT1_292270	24.53	1.96	3.6106	1.75e-06	5.21e-06
TGGT1_273130	1894.02	176.74	3.4329	2.15e-217	6.08e-214
TGGT1_207140	133.01	12.17	3.4291	1.76e-28	1.84e-27
TGGT1_275370	224.33	20.58	3.4187	3.93e-45	8.17e-44
TGGT1_285860	186.48	20.67	3.2056	3.45e-37	5.24e-36
TGGT1_301150	27.65	3.98	2.7772	2.26e-06	6.65e-06
TGGT1_292260	28.48	4.29	2.7171	1.05e-06	3.19e-06
TGGT1_292275	45.73	7.16	2.6875	3.38e-09	1.27e-08
TGGT1_315740	420.77	66.77	2.6615	1.75e-62	7e-61
TGGT1_301170	46.92	7.87	2.559	1.56e-08	5.51e-08
TGGT1_267160	49.62	9.54	2.4314	1.95e-08	6.84e-08
TGGT1_267150	146.41	27.99	2.4049	7.66e-21	5.62e-20
TGGT1_267140	368.22	75	2.3091	6.26e-42	1.16e-40
TGGT1_320170	75.08	16.64	2.1879	5.06e-12	2.28e-11
TGGT1_285870	4946.54	1198.86	2.0456	4.88e-40	8.32e-39
TGGT1_254060	18.06	4.58	2.0357	0.0031931	0.0065014
TGGT1_295125	11074	2465.22	2.1678	1.29e-45	2.74e-44
TGGT1_223920	20808	5114.24	2.0247	4.69e-34	6.27e-33
TGGT1_217700	1028.78	216.62	2.2497	1.4e-25	1.26e-24
TGGT1_271200	1408.34	344.15	2.0304	2.75e-74	1.53e-72
TGGT1_245670	427.22	38.75	3.4673	2.38e-61	9.22e-60
TGGT1_222020	824.32	99.98	3.0294	1.89e-107	5.52e-105
TGGT1_221320	2393.38	574.17	2.0592	1.82e-28	1.9e-27
TGGT1_310340	3.76	0	4.3279	0.0094965	0.017878
TGGT1_243180	3.38	0	4.1782	0.014857	0.026998
TGGT1_283698	24.32	1.47	4.1586	9.77e-07	2.98e-06
TGGT1_316420	2.83	0	3.9456	0.031065	0.053059
TGGT1_253390	5.49	0.31	3.933	0.0085059	0.016146
TGGT1_235580	5.47	0.39	3.9275	0.0089661	0.016959
TGGT1_255480	2.78	0	3.8856	0.034111	0.057726
TGGT1_285350	2.59	0	3.8104	0.037351	0.062585
TGGT1_211330	909.98	71.92	3.6794	1.3e-143	1.37e-140
TGGT1_266770	3.84	0.39	3.4195	0.04003	0.066559
TGGT1_408640	9.67	1.01	3.2727	0.0023542	0.004892
TGGT1_235315	12.42	1.33	3.2182	0.00067938	0.0015131
TGGT1_408990	6.02	0.62	3.2073	0.018841	0.033568
TGGT1_316410	8.78	0.94	3.169	0.0048295	0.0095285
TGGT1_233140	1788.1	199.27	3.1651	5.59e-227	2.37e-223
TGGT1_283702	1033.43	124.91	3.0501	1.73e-104	3.95e-102
TGGT1_267980	1117.53	136.28	3.0451	3.2e-125	2.71e-122
TGGT1_232450	847.21	106.47	2.9872	2.75e-112	1.01e-109
TGGT1_207015	5.46	0.77	2.9783	0.030978	0.052932
TGGT1_284010	925.61	118.55	2.9692	6.64e-111	2.16e-108
TGGT1_311740	607.29	77.97	2.9651	3.51e-90	4.13e-88
TGGT1_254890	93.7	12	2.9618	1.09e-19	7.55e-19
TGGT1_210450	40.38	5.44	2.9092	4.22e-09	1.57e-08
TGGT1_217750	240.53	32.37	2.8962	2.05e-36	3e-35
TGGT1_209045	9.91	1.39	2.8834	0.0034747	0.0070189
TGGT1_280770	3533.08	492.47	2.8443	3.83e-45	8e-44
TGGT1_409350	4.8	0.7	2.8376	0.040469	0.067224
TGGT1_230480	1323.8	191.96	2.7985	3.41e-122	2.06e-119
TGGT1_237880	9350.76	1349.91	2.7933	0	0
TGGT1_410150	4.66	0.7	2.7792	0.045724	0.07498
TGGT1_234670	247.44	36.06	2.773	6.62e-39	1.08e-37
TGGT1_212780	2270.64	336.31	2.7575	4.28e-53	1.24e-51
TGGT1_297120	3780.12	560.84	2.754	5.1e-30	5.81e-29
TGGT1_214545	16.02	2.56	2.7387	0.00032726	0.00075819
TGGT1_268000	500.38	76.47	2.7199	4.52e-59	1.62e-57
TGGT1_275610	2660.63	404.87	2.7177	7.41e-27	7.16e-26
TGGT1_254880	3052.95	466.8	2.711	6.72e-54	2e-52
TGGT1_232560	1876.08	288.08	2.7097	1.44e-132	1.35e-129
TGGT1_242860	903.02	140.57	2.6925	2.75e-106	7.27e-104
TGGT1_244300	724.08	112.63	2.6899	2.96e-20	2.11e-19
TGGT1_231815	832.13	129.95	2.6881	4.92e-83	4.05e-81
TGGT1_319860	2268.08	353.11	2.6869	1.19e-123	9.19e-121
TGGT1_237080	6.16	0.94	2.6324	0.031519	0.053759
TGGT1_239530	496.25	79.54	2.6284	2.08e-63	8.62e-62
TGGT1_244500	4507.33	751.61	2.5853	3.49e-35	4.87e-34
TGGT1_208910	1076.12	180.48	2.5803	1.83e-30	2.14e-29
TGGT1_257550	2483.36	418.55	2.5702	5.03e-26	4.66e-25
TGGT1_278145	36.41	6.3	2.5255	1.53e-07	5.01e-07
TGGT1_278365	218.56	38.83	2.4943	4.78e-35	6.61e-34
TGGT1_255500	28.02	5	2.4773	1.57e-05	4.25e-05
TGGT1_233870	1045.22	188.52	2.4757	9.28e-101	1.71e-98
TGGT1_278130	2252.54	406.76	2.4714	7.42e-30	8.39e-29
TGGT1_290200	4564.87	846.31	2.4333	2.5e-161	4.23e-158
TGGT1_218540	1200.26	225.41	2.4071	3.44e-105	8.32e-103
TGGT1_217740	983.86	187.41	2.3902	1.12e-89	1.28e-87
TGGT1_218890	10.73	2.1	2.3874	0.0062784	0.012174
TGGT1_272900	519.67	100.58	2.3719	8.79e-63	3.56e-61
TGGT1_240290	10.2	1.95	2.3704	0.0064503	0.012488
TGGT1_271090	723.93	141.34	2.3594	2.33e-75	1.38e-73
TGGT1_225990	286.33	55.6	2.3576	6.88e-29	7.37e-28
TGGT1_297870	1754.88	345.07	2.3524	1.47e-101	2.84e-99
TGGT1_278380	6.78	1.4	2.3278	0.026645	0.046058
TGGT1_265060	23.95	4.96	2.3254	6.3e-05	0.00015956
TGGT1_261740	33571.2	6786	2.3067	1.55e-29	1.71e-28
TGGT1_239830	5210.4	1062.23	2.295	2.48e-35	3.47e-34
TGGT1_259280	7.99	1.63	2.2783	0.018254	0.032564
TGGT1_362110	8.01	1.64	2.2617	0.020623	0.036521
TGGT1_277572	6.49	1.4	2.2601	0.035247	0.059459
TGGT1_234400	8.09	1.71	2.2513	0.025747	0.044679
TGGT1_238895	3201	674.75	2.2474	5.66e-42	1.05e-40
TGGT1_262950	3163.68	669.01	2.2427	6.93e-27	6.73e-26
TGGT1_248560	88.22	18.98	2.2288	7.09e-14	3.6e-13
TGGT1_233150	6.38	1.4	2.2221	0.041045	0.068073
TGGT1_276110	452.17	97.54	2.2132	1.15e-59	4.18e-58
TGGT1_280435	7.61	1.64	2.21	0.024468	0.042713
TGGT1_233540	577.26	125.69	2.2053	1.92e-58	6.75e-57
TGGT1_203505	7.72	1.78	2.1637	0.026962	0.046568
TGGT1_219100	657.24	147.77	2.1548	3.28e-78	2.19e-76
TGGT1_218530	658.37	147.82	2.1533	6.01e-80	4.39e-78
TGGT1_289890	485.43	109.26	2.1491	8.17e-58	2.82e-56
TGGT1_209900	397.19	89.9	2.1412	1.27e-48	3.05e-47
TGGT1_265420	2023.27	461.53	2.1359	1.1e-96	1.58e-94
TGGT1_248570	772.85	176.26	2.1327	2.5e-75	1.47e-73
TGGT1_220930	3095.06	707.03	2.1319	6.84e-113	2.63e-110
TGGT1_210412	276.14	63.71	2.1318	7.93e-28	8.05e-27
TGGT1_289070	1163.33	266.38	2.124	2.67e-83	2.24e-81
TGGT1_265065	199.14	45.58	2.1163	4.83e-27	4.72e-26
TGGT1_202730	582.59	134.87	2.1138	5.21e-52	1.45e-50
TGGT1_210280	578.56	133.89	2.1103	5.6e-61	2.13e-59
TGGT1_269340	6257.95	1461.68	2.0986	6.4e-34	8.55e-33
TGGT1_244280	14069.9	3286.99	2.0985	2.49e-215	5.27e-212
TGGT1_203705	31.29	7.26	2.0973	1.27e-05	3.5e-05
TGGT1_290930	8.47	1.95	2.0938	0.019997	0.035479
TGGT1_231800	202.75	47.8	2.0852	2.35e-24	2e-23
TGGT1_218450	8.55	2.1	2.0813	0.024964	0.043517
TGGT1_260410	274.8	64.45	2.0813	3.53e-33	4.6e-32
TGGT1_315500	911.64	216.13	2.0798	8.21e-17	4.91e-16
TGGT1_315360	1615.97	385.48	2.0716	2.4e-87	2.36e-85
TGGT1_265650	557.79	133.59	2.0675	4.57e-51	1.22e-49
TGGT1_293170	2521.86	609.64	2.0508	3.05e-84	2.61e-82
TGGT1_238995	649.44	156.57	2.0507	1.09e-61	4.25e-60
TGGT1_226690	1655.11	401.82	2.0456	4.89e-86	4.55e-84
TGGT1_286500	734.81	178.7	2.0431	5.29e-54	1.59e-52
TGGT1_217520	3880.23	944.69	2.0392	9.9e-30	1.11e-28
TGGT1_265770	2121.52	519.23	2.0326	1.95e-105	4.85e-103
TGGT1_232550	2487.02	612.07	2.0235	4.94e-161	6.98e-158
TGGT1_216620	5315.88	1312.64	2.0183	5.93e-32	7.38e-31
TGGT1_311420	8.12	2.02	2.0164	0.029378	0.050411
TGGT1_264600	1558.3	388.38	2.0094	1.19e-84	1.03e-82
TGGT1_260580	2295.16	572.18	2.0054	9.65e-21	7.03e-20
TGGT1_322000	1582.36	395.63	2.0051	1.53e-89	1.7e-87
TGGT1_262970	199.82	1238.12	-2.6237	1.8869e-114	8.4115e-112
TGGT1_411310	82.74	404.71	-2.2846	1.7538e-37	2.7106e-36
TGGT1_411520	64.5	330.82	-2.3492	2.3068e-37	3.5396e-36
TGGT1_206290	71.7	332.88	-2.2008	5.6676e-37	8.5115e-36
TGGT1_223258	31.18	133.34	-2.0953	7.0493e-19	4.694e-18
TGGT1_203685	12.51	62.96	-2.3128	7.1231e-11	2.9735e-10
TGGT1_264230	12.82	50.46	-2.0117	2.0064e-07	6.4986e-07
TGGT1_307070	0.89	10.33	-3.416	0.0019155	0.0040299
TGGT1_202025	0.9	6.31	-2.72	0.021086	0.037286
TGGT1_281040	1.91	8.56	-2.128	0.022001	0.038749
TGGT1_212710	0	2.72	-3.9006	0.031342	0.053501
TGGT1_210783	0.6	4.67	-2.8725	0.04574	0.07498
