# Supplementary material for: Iron stress affects the survival of Toxoplasma gondii
Source: Research Square preprint supplement (doi:10.21203/rs.3.rs-3240882/v1), 2023-08-11

Fig. S1 Toxicity of different iron treatment agents to HFF cells and *Toxoplasma gondii*

A, cytotoxicity of DFO on HFF cells. Toxicity of DFO at concentrations ranging from 0.1 to 500 μM on HFF cells was assessed using the CCK-8 reagent. DMSO was used as a control. The survival rate was calculated as 1- (RLUDMSO-RLUDFO)/RLUDMSO. B, cytotoxicity of ammonium iron(II) sulfate (1–1600 μM) on HFF cells. C, half lethal concentration curve depicting the effects of BPDS (1–1000 μM) on *Toxoplasma* replication. D, cytotoxicity of BPDS (2.5–1000 μM) on HFF cells. E, half-lethal concentration curve showing the effects of iron(III) chloride (1–1600 μM) on *Toxoplasma* replication. F, cytotoxicity of iron(III) chloride (1–1600 μM) on HFF cells.


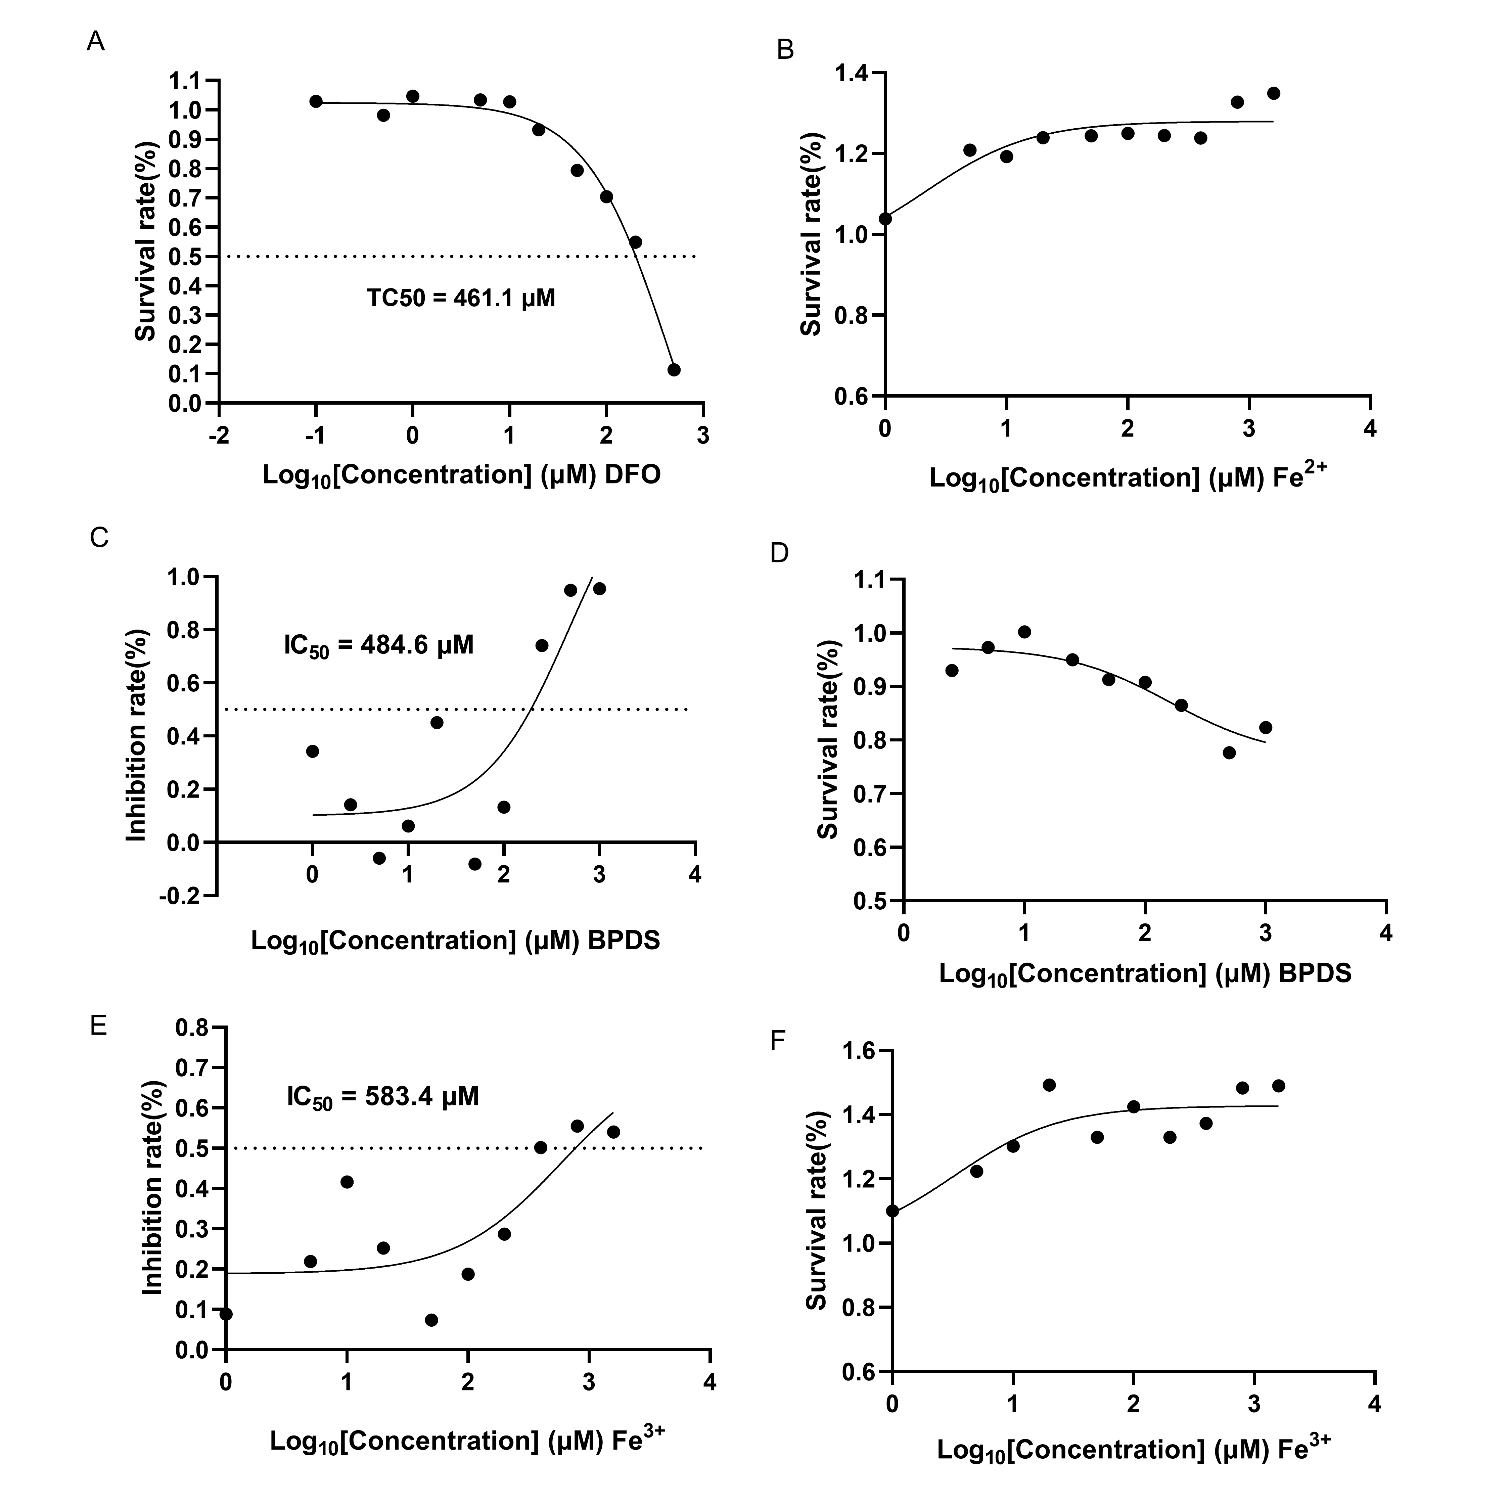


Fig. S2 KEGG enrichment analysis of differentially expressed genes in *Toxoplasma gondii* transcriptome under iron deficiency and iron overload. A, KEGG enrichment analysis of up-regulated differential genes under iron deficiency. B, KEGG enrichment analysis of up-regulated differential genes under iron overload.


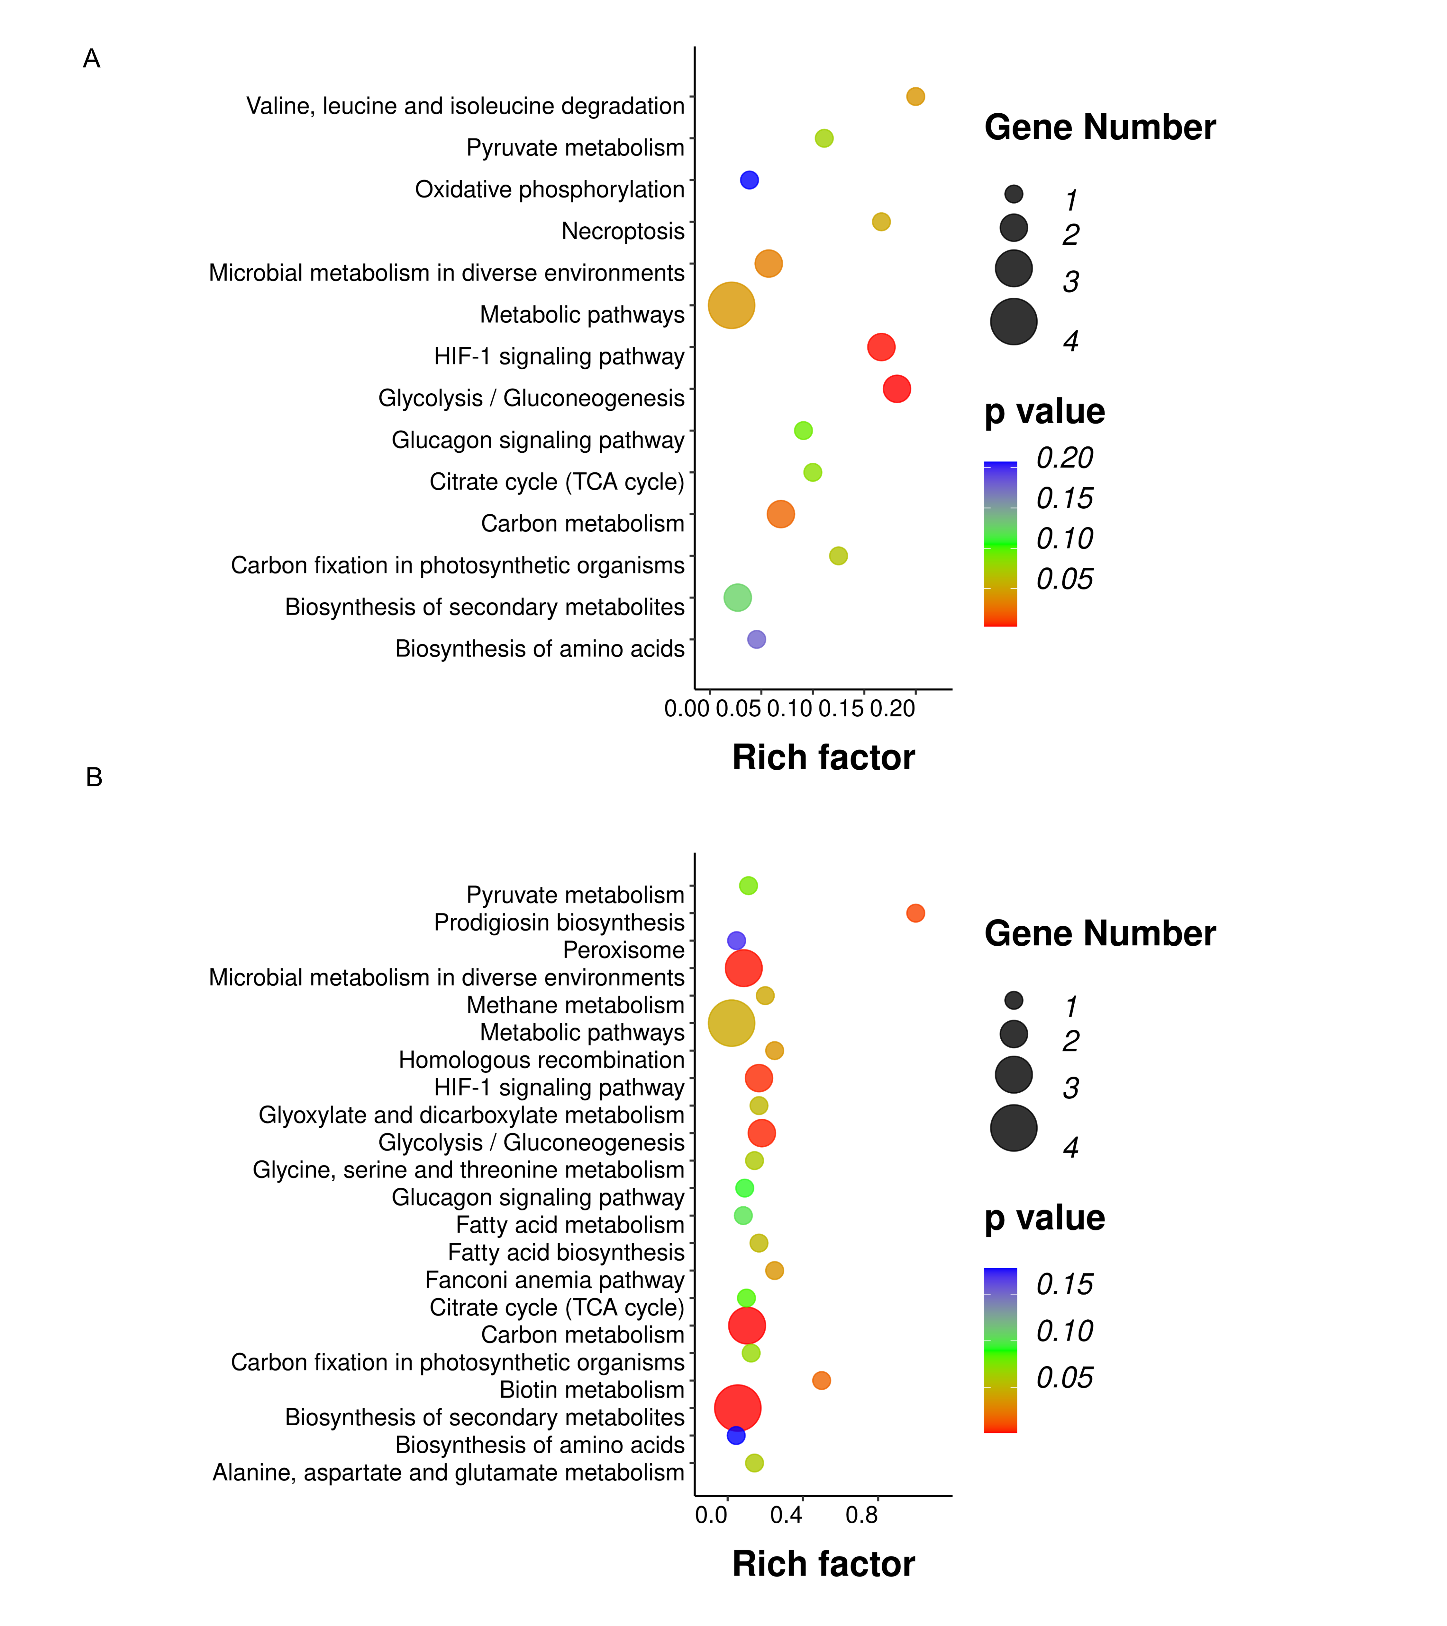


Fig. S3 Prussian Blue staining of liver slices reflecting changes in iron levels in mice under iron chelation therapy and iron supplementation therapy. A, negative control, intraperitoneal injection of an equal amount of PBS solution. B, iron chelation therapy, intraperitoneal injection of the iron chelating agents DFO at a dose of 300 mg/Kg. C, iron supplementation therapy, intraperitoneal injection of iron supplements ammonium iron(II) sulfate at a dose of 100 mg/Kg. The blue area indicates the deposition of iron ions.


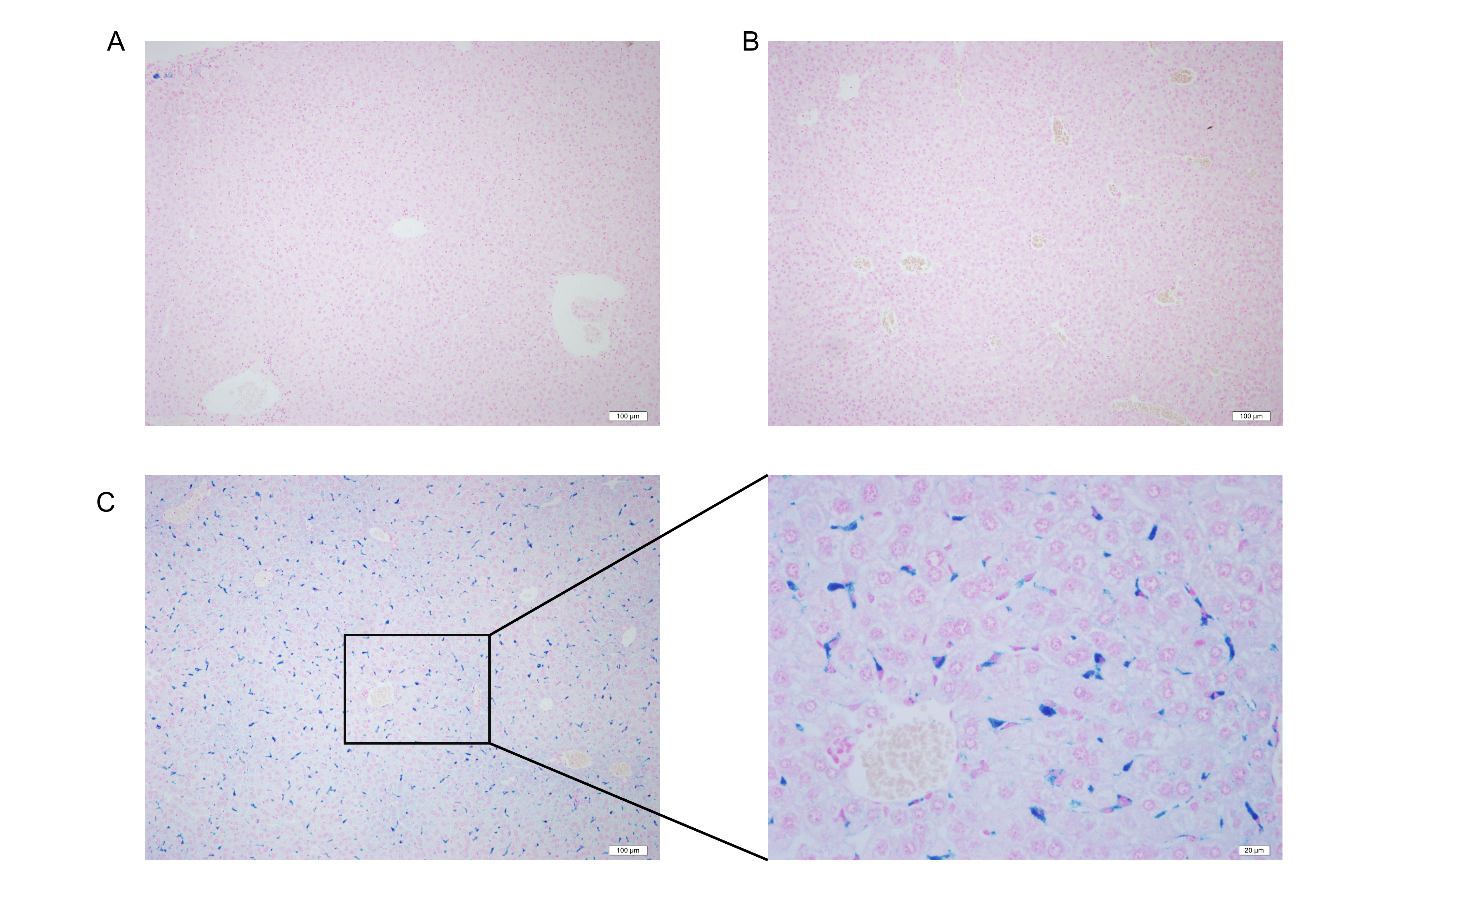

Supplement: Supplementary file 1 [file f6c845aa9312c97098202969.docx]
